# Supplementary material for: The Role of α3β1 Integrin Modulation on Fabry Disease Podocyte Injury and Kidney Impairment
Source: MDPI journal article supplement (doi:10.3390/toxins15120700), 2023-12-14
Supplement: s1 [file s1]

## Supplementary material

Supplementary Figure S1

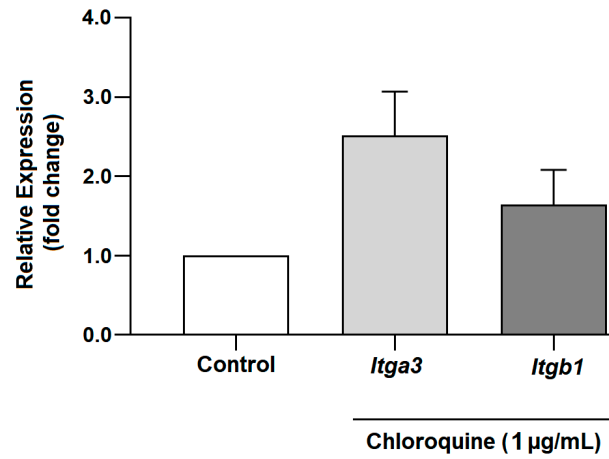

**Figure S1.** Relative expression of the *Itga3* and *Itgb1* by RT-qPCR. Increased relative expression of the *Itga3* and *Itgb1* genes in untreated (control) or CQ-treated (1 µg/mL) podocytes for 72 h at 37°C. The relative expression of mRNA was determined by the  $2^{-\Delta\Delta C_t}$  method, using *Rplp0* as a normalizing gene. The values refer to the mean  $\pm$  SEM of three independent experiments ( $n = 3$ ). The data were analyzed using the Mann-Whitney test ( $ns > 0.05$ ).
